# Supplementary material for: The Cellular Prion Protein Increases the Uptake and Toxicity of TDP-43 Fibrils
Source: MDPI journal article supplement (doi:10.3390/v13081625), 2021-08-17
Supplement: s1 [file s1]

## Supplementary Material

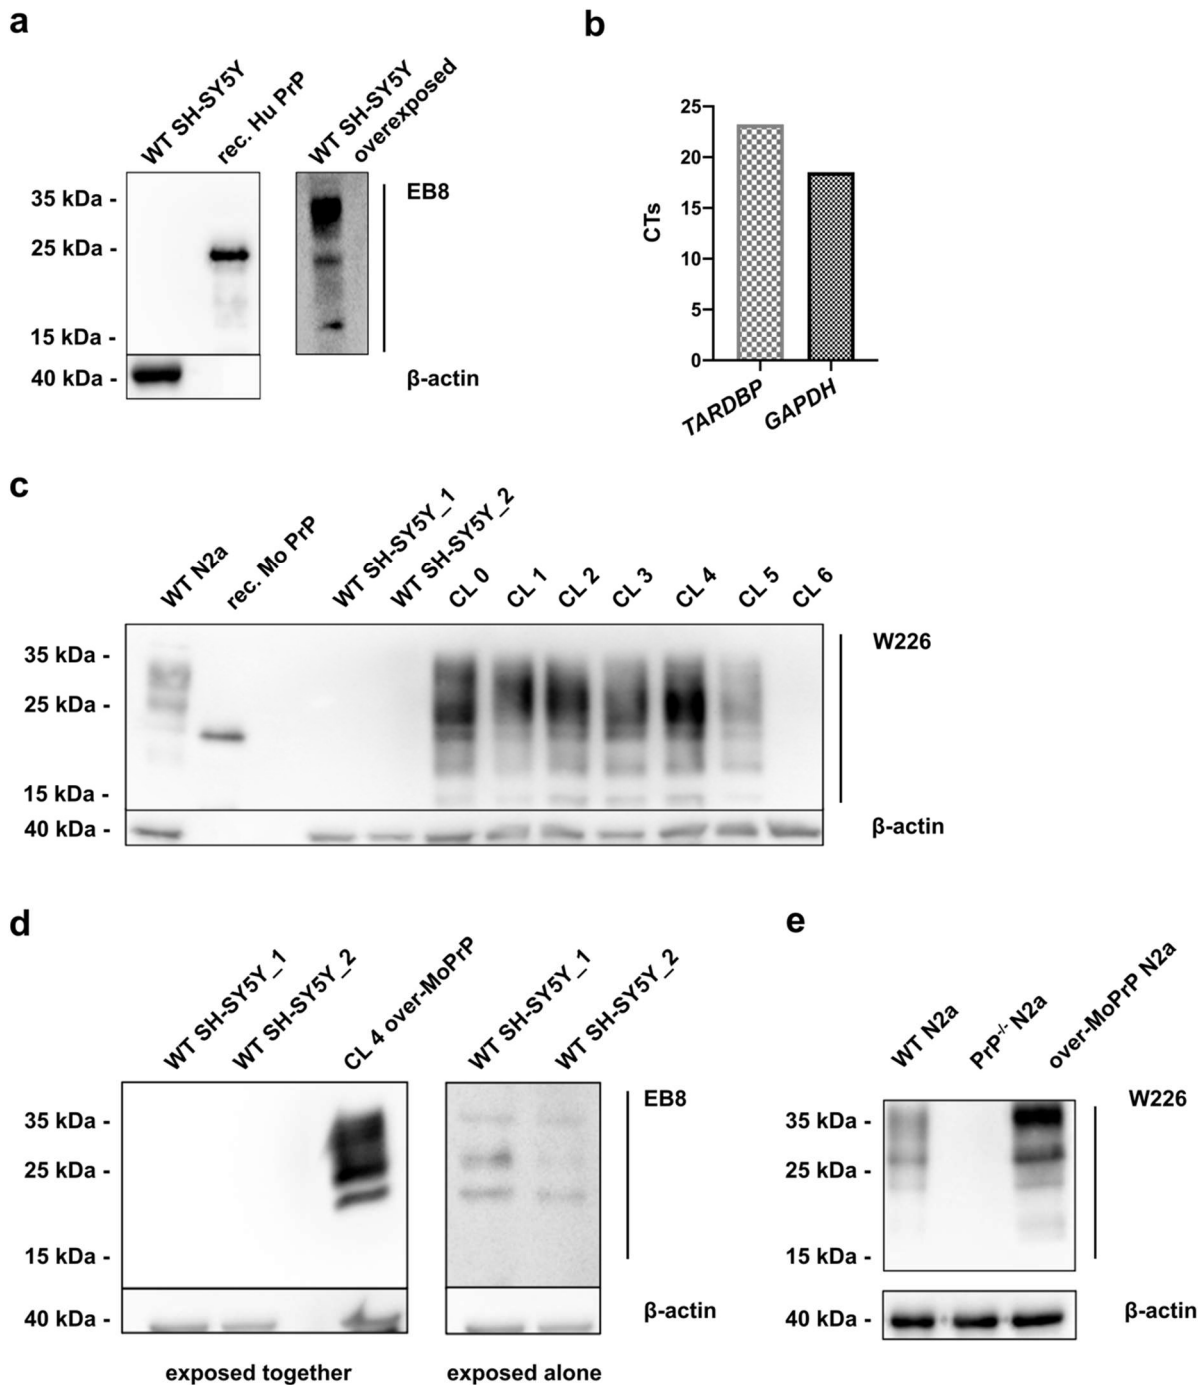

**Figure S1. Expression levels of endogenous TDP-43 and PrP<sup>C</sup> in WT SH-SY5Y cells, generation of a MoPrP<sup>C</sup>-overexpressing cell line and verification of PrP<sup>-/-</sup> and over-MoPrP<sup>C</sup> N2a cells.** (a) WB analysis of WT-SHSY5Y cells showing the levels of expression of endogenous PrP<sup>C</sup>; mouse recombinant PrP<sup>C</sup> (recMoPrP) (25 ng) was loaded as positive control; after quantification 50 µg of total proteins were loaded for each cell lysate and β-actin was used as a loading control. Only when the membrane was cut and overexposed it was possible to observe a signal corresponding to the endogenous PrP<sup>C</sup>; (b) real-time quantitative polymerase chain reaction (RT-qPCR) analysis of the expression of endogenous TDP-43 (*TARDBP*) in WT SH-SY5Y cells compared to the Glyceraldehyde-3-phosphate dehydrogenase (*GAPDH*) house-keeping gene. CTs: cycle thresholds. The evaluation was performed in triplicate; (c) generation of MoPrP<sup>C</sup> overexpressing SH-SY5Y cells and selection of the most overexpressing clone (CL 4) by means of WB using the anti-PrP W226 antibody; recMoPrP (25 ng) was loaded as positive control; (d) comparison of MoPrP<sup>C</sup> expression levels between over-MoPrP SH-SY5Y cells and two different samples of WT SH-SY5Y cell lysates; (e)

comparison of MoPrP<sup>C</sup> expression levels between WT, PrP<sup>-/-</sup> and over-MoPrP N2a cells. After quantification 50 µg of total proteins were loaded for each cell lysate and β-actin was used as a loading control.

**a**

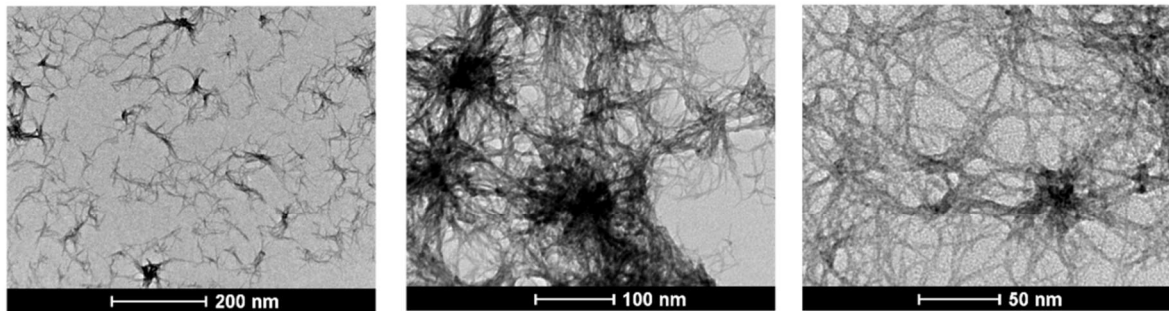

**b**

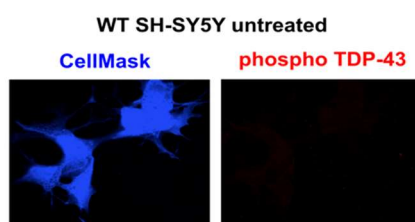

**c**

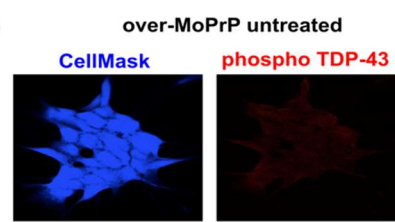

**d**

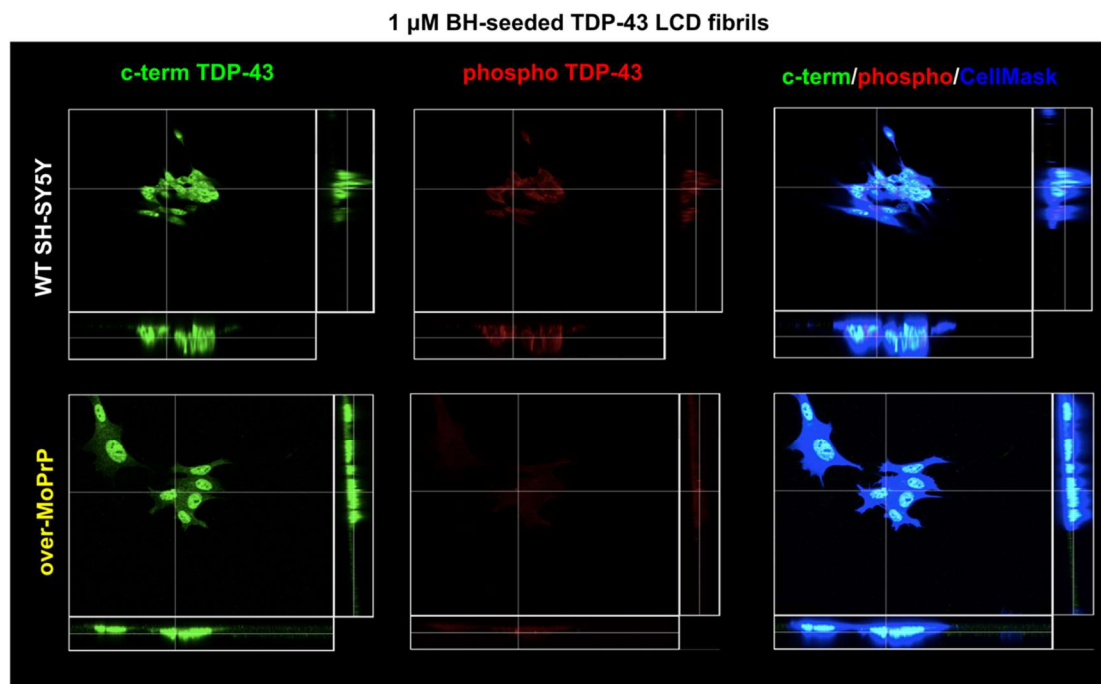

**Figure S2. Intracellular uptake and phosphorylation of BH-seeded TDP-43 LCD fibrils.** (a) Transmission electron microscopy analysis of TDP-43 LCD BH-seeded fibrils collected when the reaction reached its plateau; representative immunofluorescence images of untreated WT (b) and over-MoPrP (c) SH-SY5Y cells; blue staining corresponds to the CellMask which defines whole-cell bodies while the red staining corresponds to the anti-phospho TDP-43 (Ser409/Ser410) antibody; (d) representative orthogonal views of the 3D Z-stack for WT and over-MoPrP cells treated with 1 µM BH-seeded TDP-43 LCD fibrils following 6 hours of incubation and 24 hours before analysis; since BH-seeded fibrils were not conjugated with any fluorescent dye, the green staining corresponds to the signal of the anti-TDP-43 C-terminal antibody which recognizes both endogenous TDP-43 (mainly nuclear) and the *in vitro* produced TDP-43 LCD fibrils. Red spots correspond to TDP-43 aggregates recognized by the anti-phospho TDP-43 (Ser409/Ser410) antibody; all experiments represented in the image were replicated three times.
